# Supplementary material for: Establishment and Evaluation of Immune Checkpoint Inhibitor Treatment Response Model Based on Gene Expression Value
Source: Research Square preprint supplement (doi:10.21203/rs.3.rs-870917/v1), 2021-09-13
Supplement: Supplementary file 1 [file a4da5b93834b7b86eda6a104.xlsx]

## Sheet: Sheet1
Tab. 1 Details of the associated datasets from the GEO database
Dataset	Cancer Type	Anti-PD1 response	Biopsy time	Drugs	Notes
GSE78220	melanoma	response 15；nonresponse 13	pre or on treatment	pembrolizumab	response(CR/PR):0 nonresponse(PD/SD):1
GSE91061	melanoma	response 23；nonresponse 82	pre or on treatment	nivolumab
GSE67501	renal cell carcinoma	response 4;nonresponse 7	pre treatment	nivolumab
