# Supplementary material for: Establishment and Evaluation of Immune Checkpoint Inhibitor Treatment Response Model Based on Gene Expression Value
Source: Research Square preprint supplement (doi:10.21203/rs.3.rs-870917/v1), 2021-09-13
Supplement: Supplementary file 3 [file f0da03f27073b5b2c4b3f8a0.xlsx]

## Sheet: coef
Tab. 2 Related genes involved in the predictive model of anti-PD1 immunotherapy response
Gene	Coef
(Intercept)	0.683547
PTPDC1	0.115829
SDCCAG8	0.0521215
PPAN	-0.0694677
STK40	-0.00490575
SNORD16	0.00455714
