# Supplementary material for: Establishment and Evaluation of Immune Checkpoint Inhibitor Treatment Response Model Based on Gene Expression Value
Source: Research Square preprint supplement (doi:10.21203/rs.3.rs-870917/v1), 2021-09-13
Supplement: Supplementary file 4 [file a89d28a8f5b9e48834d881c4.xlsx]

## Sheet: Table3
Tab. 3 The accuracy of the anti-PD1 immunotherapy response prediction model in the training and validation datasets
Dataset	SE	SP	PPV	NPV	Accuracy	AUC
Training	1	0.7083	0.8889	1	0.9125	0.9717
Validation	0.9231	0.5714	0.8571	0.7273	0.8302	0.7967
